# Supplementary material for: A one step method for isolation of genomic DNA using multi-amino modified magnetic nanoparticles
Source: Royal Society of Chemistry journal article supplement (doi:10.1039/d0ra09409a), 2021-01-01
Supplement: d0ra09409a1.pdf [file d0ra09409a1.pdf]

## **A one step method for isolation of genomic DNA using multi-amino modified magnetic nanoparticles**

Jia Xu, <sup>a,1</sup> Dan Chen, <sup>b,1</sup> Yuan Yang, <sup>a,1</sup> Hongjian Gong, <sup>a</sup> Wenqi Gao <sup>a</sup> and Han Xiao <sup>a,\*</sup>

<sup>a</sup> *Institute of Maternal and Child health, Wuhan Children's Hospital (Wuhan Maternal and Child Healthcare Hospital), Tongji Medical College, Huazhong University of Science & Technology, Wuhan, 430016, China*

<sup>b</sup> *Wuhan Institute for Food and Cosmetic Control, Wuhan, 430012, China*

\* Corresponding author: Han Xiao

*E-mail address:* tjxiaohan1980@163.com

<sup>1</sup> These authors contributed equally to this work.

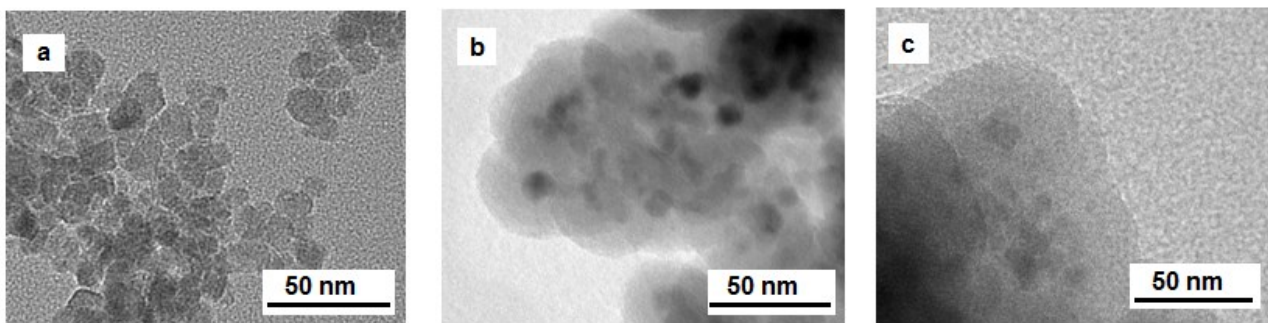

**Fig.S1** TEM images of Fe<sub>3</sub>O<sub>4</sub> nanoparticles (a), SMNPs (b), and mAMNPs (c).

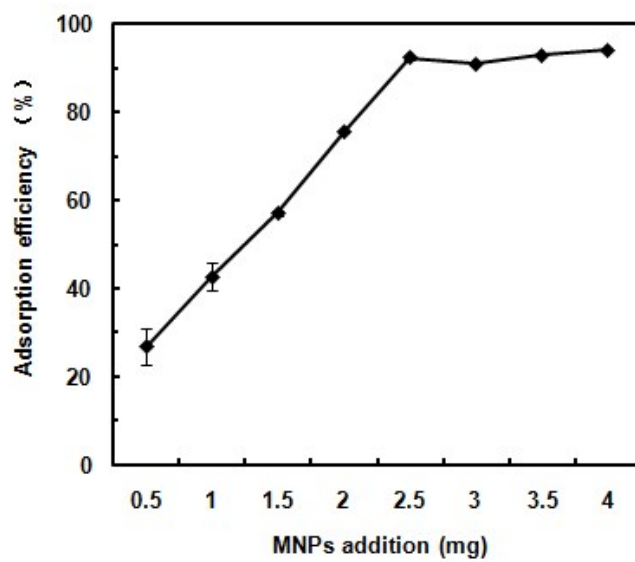

**Fig.S2** The effect of MNPs addition on adsorption efficiency at pH 3.0 with an adsorption time of 10 min.

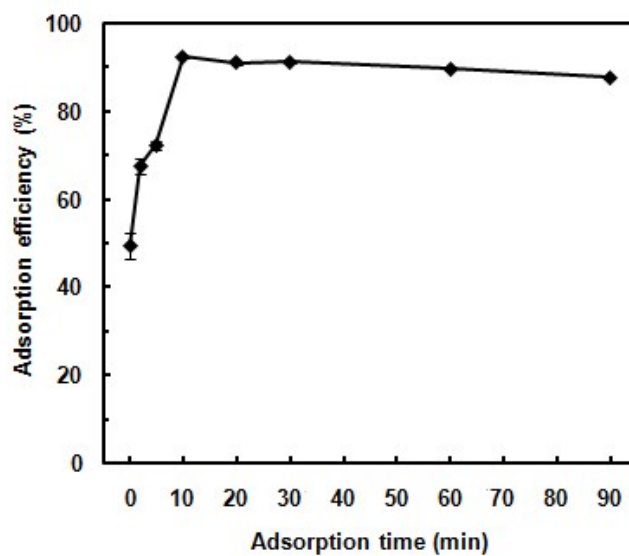

**Fig.S3** The effect of adsorption time on adsorption efficiency at pH 3.0 using 2.5 mg mAMNPs.

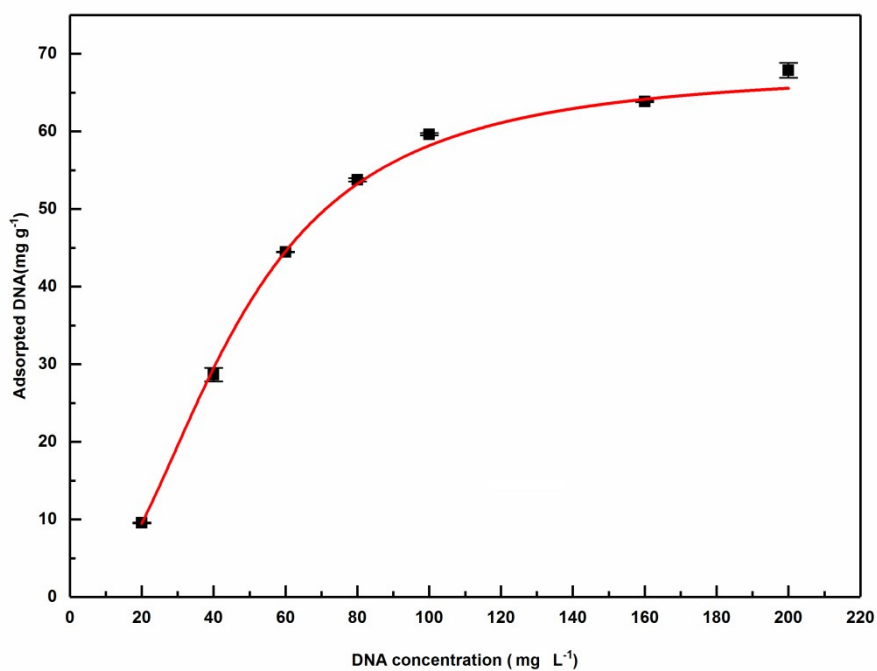

**Fig.S4** Adsorption isotherm of DNA onto the mAMNPs at pH 3.0 using 2.5 mg mAMNPs with an adsorption time of 10 min.

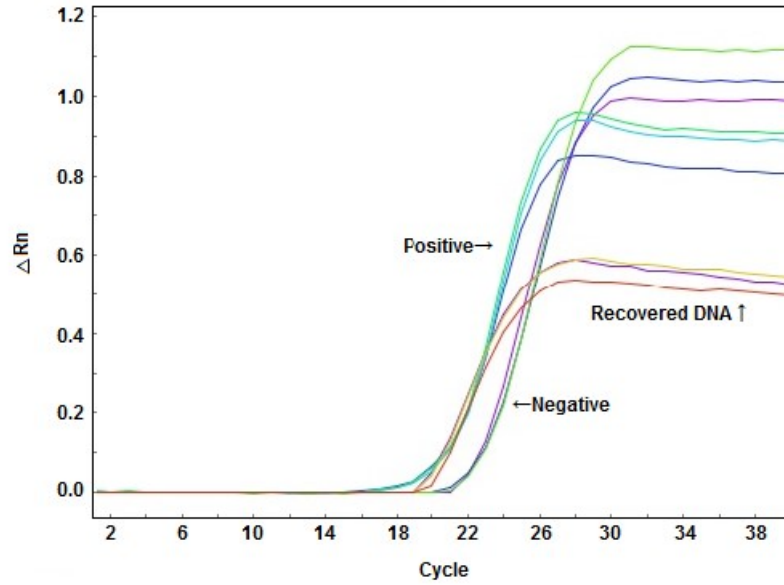

**Fig.S5** Real-time PCR of  $\beta$ -actin sequences from human whole blood using the supernatant after desorption as templates. (Positive: DNA was recovered from a commercial DNA-extraction kit; Negative: 1 $\mu$ L sterilized water instead of DNA).

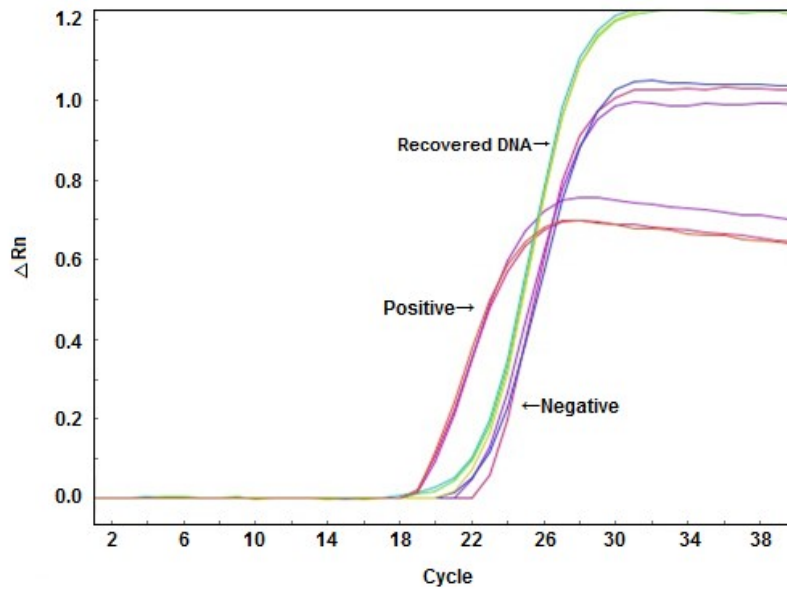

**Fig.S6** Real-time PCR of EGFR sequences from human whole blood using the supernatant after desorption as templates. (Positive: DNA was recovered from a commercial DNA-extraction kit; Negative: 1 $\mu$ L sterilized water instead of DNA).
